# Supplementary material for: An electrochemical thermal transistor
Source: PubMed Central journal article supplement (PMC6207649; doi:10.1038/s41467-018-06760-7), 2018-10-30
Supplement: 41467_2018_6760_MOESM2_ESM.pdf [file 41467_2018_6760_MOESM2_ESM.pdf]

### **Description of Additional Supplementary Files**

File Name: Supplementary Movie 1

Description: In operando thermal conductance microscopy. Video montage of scanning TDTR images showing Li intercalation in 10 nm thick MoS<sub>2</sub>, taken at different stages of the electrochemical cycle.
